# Supplementary material for: Growth Promotion and Economic Benefits of the Probiotic <em>Lactiplantibacillus plantarum</em> in Calves
Source: Preprints.org preprint supplement (doi:10.20944/preprints202409.0990.v1), 2024-09-12
Supplement: Supplementary file 1 [file supplementary]

**Supplementary Table 1.**

**Primers for Cytokine gene expression**

Target gene Sequences（５‘―３’）

*IL2* Forward TGCACTAACTCTTGAACTCG

Reverse ACCTTGGGCACGTAAAAGTC

*IL5* Forward TGGTGGCAGAGACTTTGACA

Reverse GAATCATCAAGTTCCCATCACCTA

*IL10* Forward TGACATCAAGGAGCACGTGAA

Reverse TCTCCACCGCCTTGCTCTT

*IL12p40* Forward CATCAGGGACATCAAAC

Reverse AACGTCAAGGAGAAGTAGGA

*IFNγ* Forward AGGTCGTCATTCAAAGGAGCATG

Reverse TTATGGCTTTGCGCTGAA

*TGFβ* Forward TTCTTCAACACGTCCAGGAAT

Reverse AGCGCCAGGAATTGTTGCTAT

*GAPDH*  Forward GATTGTCAGCAATGCCTCCT

Reverse GGTCATAAGTCCCTCCACGA

**Supplementary Table 2.**

**Overview of Drugs for Disease Treatment and Dates of Disease**

No. Group Dates of disease medication

1 LP1 13 Pneumonia Marbofloxacin (Marbocyl)

2 CN 17 Pneumonia Marbofloxacin (Marbocyl)

2 CN 18 Pneumonia Marbofloxacin (Marbocyl)

3 CN 11 Diarrhea Enrofloxacin (Baytril) **

3 CN 12 Diarrhea Enrofloxacin (Baytril)

3 CN 29 Diarrhea Enrofloxacin (Baytril)

3 CN 30 Diarrhea Enrofloxacin (Baytril)

4 CN 11 Diarrhea Enrofloxacin (Baytril)

4 CN 12 Diarrhea Enrofloxacin (Baytril)

4 CN 29 Diarrhea Enrofloxacin (Baytril)

4 CN 30 Diarrhea Enrofloxacin (Baytril)

5 CN 11 Diarrhea Enrofloxacin (Baytril)

5 CN 12 Diarrhea Enrofloxacin (Baytril)

6 CN 11 Diarrhea Enrofloxacin (Baytril)

6 CN 12 Diarrhea Enrofloxacin (Baytril)

6 CN 29 Diarrhea Enrofloxacin (Baytril)

6 CN 30 Diarrhea Enrofloxacin (Baytril)

7 CN 5 Diarrhea Enrofloxacin (Baytril)

7 CN 6 Diarrhea Enrofloxacin (Baytril)

7 CN 7 Diarrhea Enrofloxacin (Baytril)

LP1: LP1 feeding group, CN: Control group.
